# Supplementary material
Source: publisher figshare collection journal article supplement (https://future-science-group.figshare.com/ndownloader/files/30751945)
Supplement: Supplementary file 1 [file 30751945]

## Sheet: Table S3
Table S3. ERVK promoters of non-canonical imprinted genes
Transcript	DMR (maternal allele)	ERVK DMR maternal allele	H3K4me3 allele	ERVK Expression	ERVK-driven paternal transcript	Expression
		EXE at 7.5 dpc	EXE at 6.5 dpc	EXE 6.5 dpc	EPC 8.5 dpc	EPC 8.5 dpc
	PMID: 31665063, PMID: 32064321	PMID: 31665063	PMID: 31665063 *shown in the current study	PMID: 31665063	This study	This study
Slc38a4	Germline DMR	MLTR31F_Mm	Paternal			Paternal
Gm32885 (Upstream of Slc38a4)	Secondary DMR	No	Paternal	Paternal	RLTR31F	Paternal
Gab1 (alternative promoter)	Secondary DMR	RLTR15	Paternal	Paternal	RLTR15	Paternal
Smoc1 (alternative promoter)	Secondary DMR	RLTR11B	Paternal	Paternal	RLTR11B	Paternal
Sall1 (alternative promoter)	Secondary DMR	RLTR20B3	Paternal	Paternal	RLTR20B3	Paternal
Jade1 (also known as Phf17)	Secondary DMR	RLTR31B_Mm	Paternal			Paternal
2400006E01Rik (Upstream of Jade1)	Secondary DMR		Paternal	Paternal	RLTR31B	Paternal
Platr4 (Upstream of Jade1)	Secondary DMR	RLTR20C	Paternal*	Paternal	RLTR20C	Paternal
Platr20 (5133400J0Rik)	Secondary DMR	RLTR31B2	Paternal	Paternal	RLTR31B2	Paternal
Gm13261 (Upstream of Sfmbt2)	Secondary DMR	Unknown	Paternal	Unknown	RLTR11B	Paternal
Sfmbt2	None	RLTR11B	Paternal	Paternal		Paternal
Sfmbt2 Intron 10 miRNAs	None	Unknown	Paternal*	Unknown	RLTR17B (n=125)	Paternal
The ERVK promoters of non-canonical imprinted transcripts match between our study and the study of Hanna et al., PMID 31665063, except for the following differences: We add the imprinted Sfmbt2 miRNA cluster at RLTR17B repeats. We assign RLTR31F to Gm32885 instead of Slc38a4, RLTR31B to 2400006E01Rik instead of Phf17 (Jade1), and RLTR17B to Gm13261 instead of Sfmbt2.
